# Supplementary figures and images for: Strand-specific libraries for high throughput RNA sequencing (RNA-Seq) prepared without poly(A) selection
Source: Springer Nature journal article supplement (doi:10.1186/1758-907x-3-9), 2012-12-01

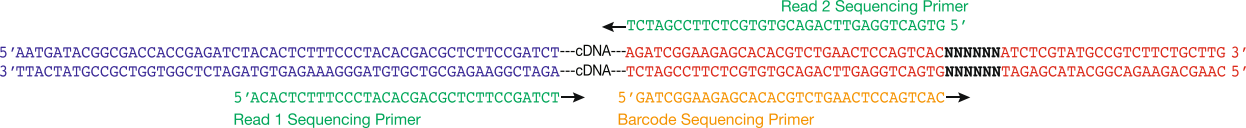

Supplement: 13101_2012_35_MOESM2_ESM.pdf [file 13101_2012_35_MOESM2_ESM.pdf]

**A**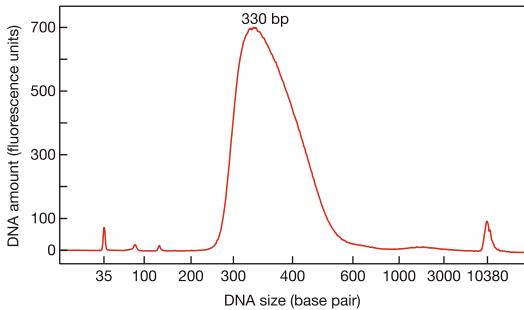**B**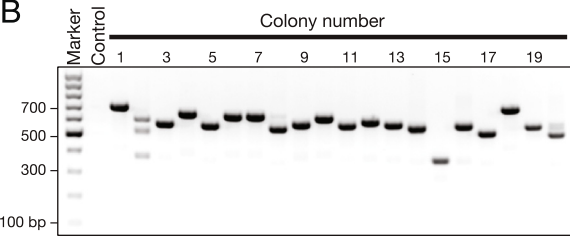

Supplement: 13101_2012_35_MOESM3_ESM.pdf [file 13101_2012_35_MOESM3_ESM.pdf]
